# Supplementary material
Source: MDPI journal article supplement (https://www.mdpi.com/2504-446X/3/3/53)
Supplement: s1 [file s1]

## Supplementary S1. Full eCognition rule sets for automated seed and seedling identification from Buters *et al.* 2019.

### **Identification of seeds:**

- 1: Multiresolution segmentation (scale parameter 10, shape: 0.4, compact: 0.7) creating 'New Level'
- 2: Assign class – *unclassified* with Total diff to scene  $\geq 100$  at New Level: *Seed*
- 3: Merge – *Seed* with Brightness  $\geq 0$  at New Level: merge region
- 4: Assign class – *Seed* with Length/Width  $> 1.5$  at New Level: *unclassified*
- 5: Assign class – *Seed* with Area  $< 0.8 \text{ cm}^2$  at New Level: *unclassified*
- 6: Assign class – *Seed* with Roundness  $\geq 0.8$  at New Level: *unclassified*

### **Identification of target seedlings (*L. angustifolia*):**

- 1: Multiresolution segmentation (scale parameter: 20, shape: 0.3, compact: 0.7) creating 'New level'
- 2: Assign class – *unclassified* with green ratio\*  $> 0.36$  at New Level: *target*
- 3: Spectral difference segmentation – *target* at New level: spectral difference 30
- 4: Assign class – *target* with Mean diff. to neighbours DEM (0)  $\geq 0.007$  at New Level: *definitely target*
- 5: Assign class – *target* with HSI Transformation Saturation (R = Layer 3, G = Layer 2, B = Layer 1)  $< 0.1$  at New level: *unclassified*
- 6: Assign class – *target* with HSI Transformation Hue (R = Layer 1, G = Layer 2, B = Layer 3)  $\geq 0.2$  and HSI Transformation Saturation (R = Layer 1, G = Layer 2, B = Layer 3)  $\geq 0.2$  at New level: *maybe target*
- 7: Assign class – *maybe target, target* with Perimeter/Width  $> 18$  at New level: *unclassified*
- 8: Assign class – *maybe target* with Compactness  $< 2.5$  at New level: *definitely target*
- 9: Assign class – *maybe target, target* with TGI  $< 21$  at New level: *unclassified*
- 10: Assign class – *maybe target, target* with TGI  $\geq 26$  at New level: *definitely target*
- 11: Pixel based object resizing – *maybe target* at New level: shrink using *maybe target* where rel. area of object pixels in  $5 \times 5 \geq 0.2$
- 12: Assign class – *definitely target, maybe target, target* with Length/Width  $\geq 5.5$  at New level: *unclassified*
- 13: Assign class – *definitely target, maybe target, target* with Area  $\leq 16 \text{ cm}^2$  at New level: *unclassified*
- 14: Assign class – *target* with Brightness  $\geq 0$  at New level: *unclassified*
- 15: Assign class – *maybe target* with Brightness  $\geq 0$  at New level: *unclassified*

\*Green ratio= Mean Green/(Mean Red + Mean Green + Mean Blue)

### **Identification of non-target grass cover (applied following Identification of target seedlings):**

- 1: Assign class – *unclassified* with TGI  $> 6.5$  and green ratio  $> 0.35$  at New level: *non-target grass*

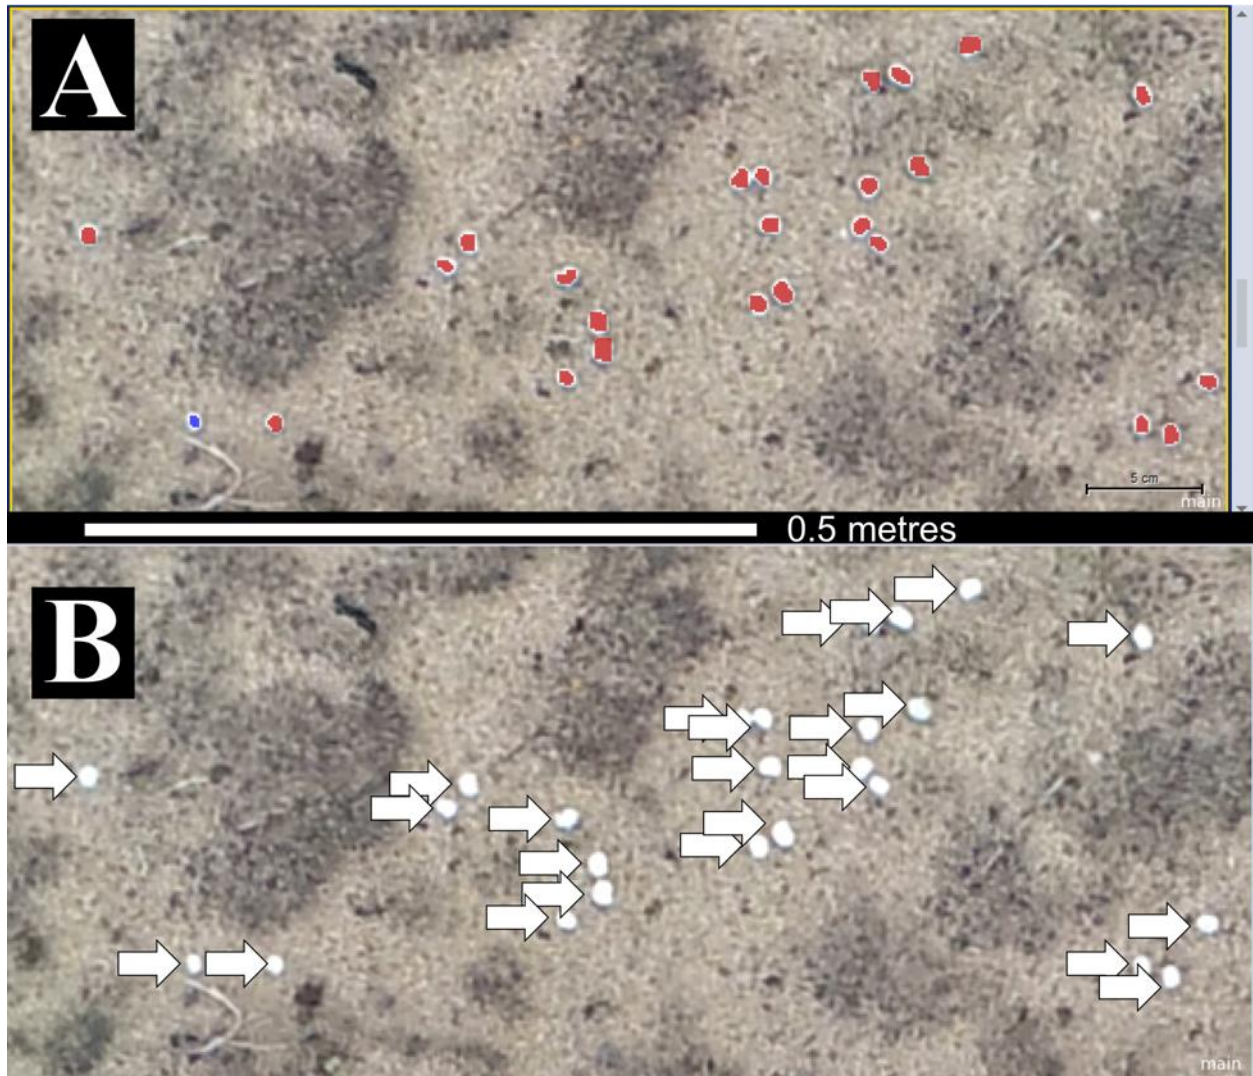

**Figure S1.** Example output image of a processed target area identifying seeds from eCognition rulesets, highlighting classes ‘*seeds*’ (red), as well as ‘missed target’ (blue) manually identified post-processing (A), with corresponding unprocessed image target area (B) in which target seeds have been manually identified (annotated arrows). Image taken from an altitude of 5 m with a DJI Phantom 4 Pro UAV.

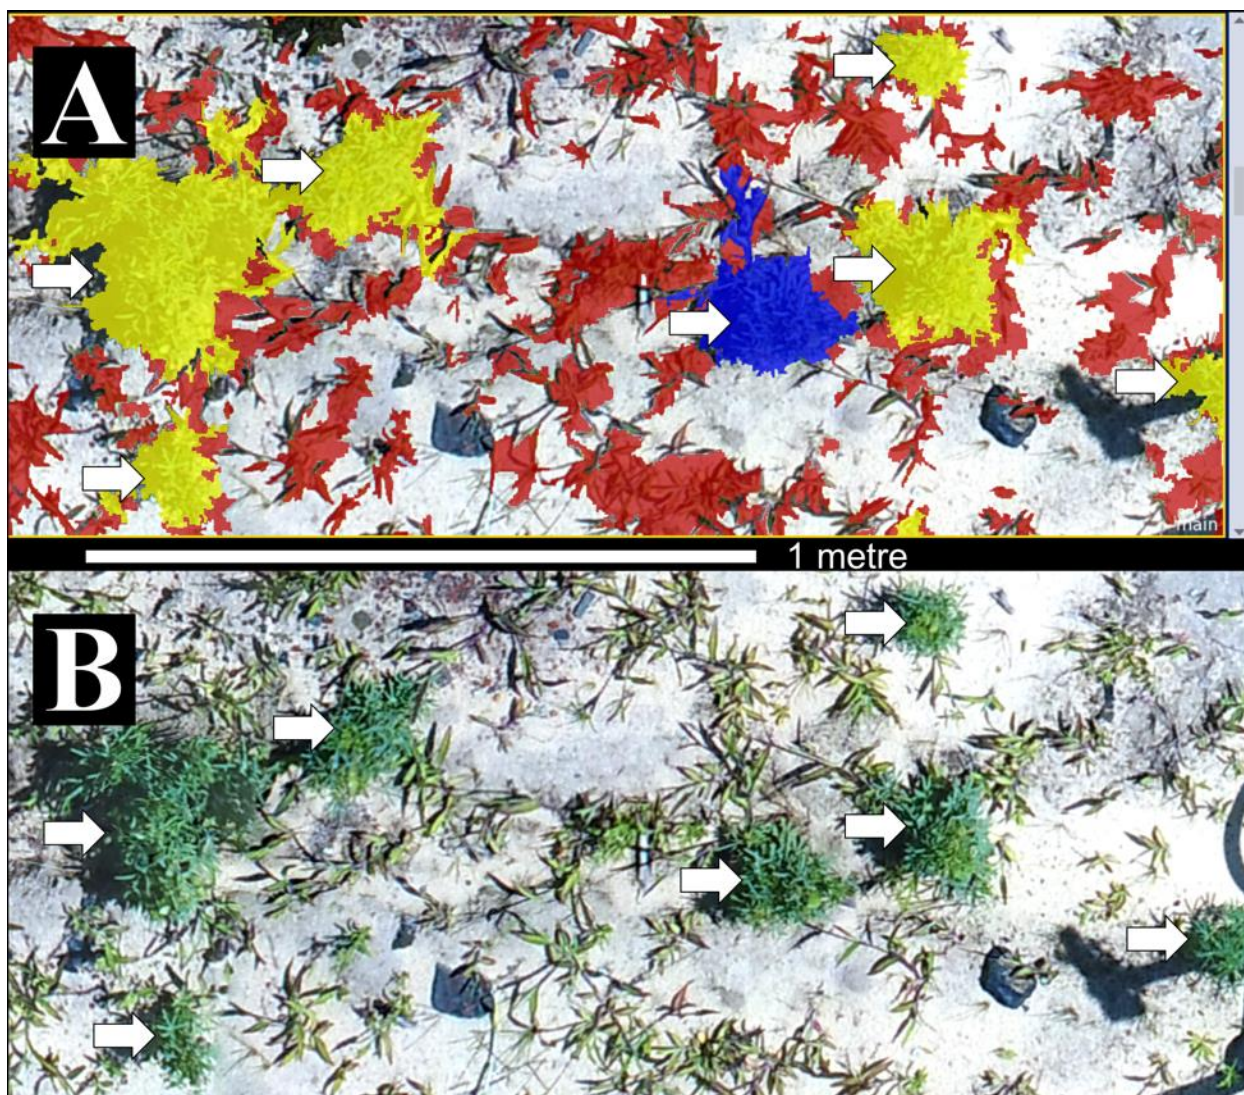

**Figure S2.** Example output image of a processed target area identifying seedlings from eCognition rulesets, highlighting classes '*definitely target*' (yellow) and '*non-target grasses*' (red), as well as '*missed target*' (blue) manually identified post-processing (A), with corresponding unprocessed image target area (B) in which target seedlings have been manually identified (annotated arrows). Image taken from an altitude of 5 m with a DJI Phantom 4 Pro UAV.
